# Supplementary material
Source: PubMed Central journal article supplement (PMC3746079)

# The HHM Motif at the CuH-site of Peptidylglycine Monooxygenase is a pH-Dependent Conformational Switch†.

Chelsey D. Kline, Mary Mayfield and Ninian J. Blackburn†\*

†Institute of Environmental, Health, Oregon Health and Sciences University,  
Beaverton, Oregon 97006

## Supporting Information

Table S1. Oligonucleotides used in the construction of PHM H-site H108A and M109I variants.

| PHMcc Mutant Oligos |                                                  |
|---------------------|--------------------------------------------------|
|                     | <b>Oligos</b>                                    |
| <b>H108A</b>        | AGCATGGATACTGTCCAC <b>GCT</b> ATGCTGCTGTTTGGATGC |
| <b>M109I</b>        | AGCATGGATACTGTCCACCAT <b>ATA</b> CTGCTGTTTGGATGC |
| <b>WT</b>           | AGCATGGATACTGTCCACCATATGCTGCTGTTTGGATGC          |

The forward primers are shown above with the mutated codon in bold while the reverse primers are complementary. WT PHMcc sequence is available for comparison.

Figure S1. Experimental (black) and simulated (red) EXAFS and Fourier transforms for reduced forms of PHM H-site variants at pH 7.5.

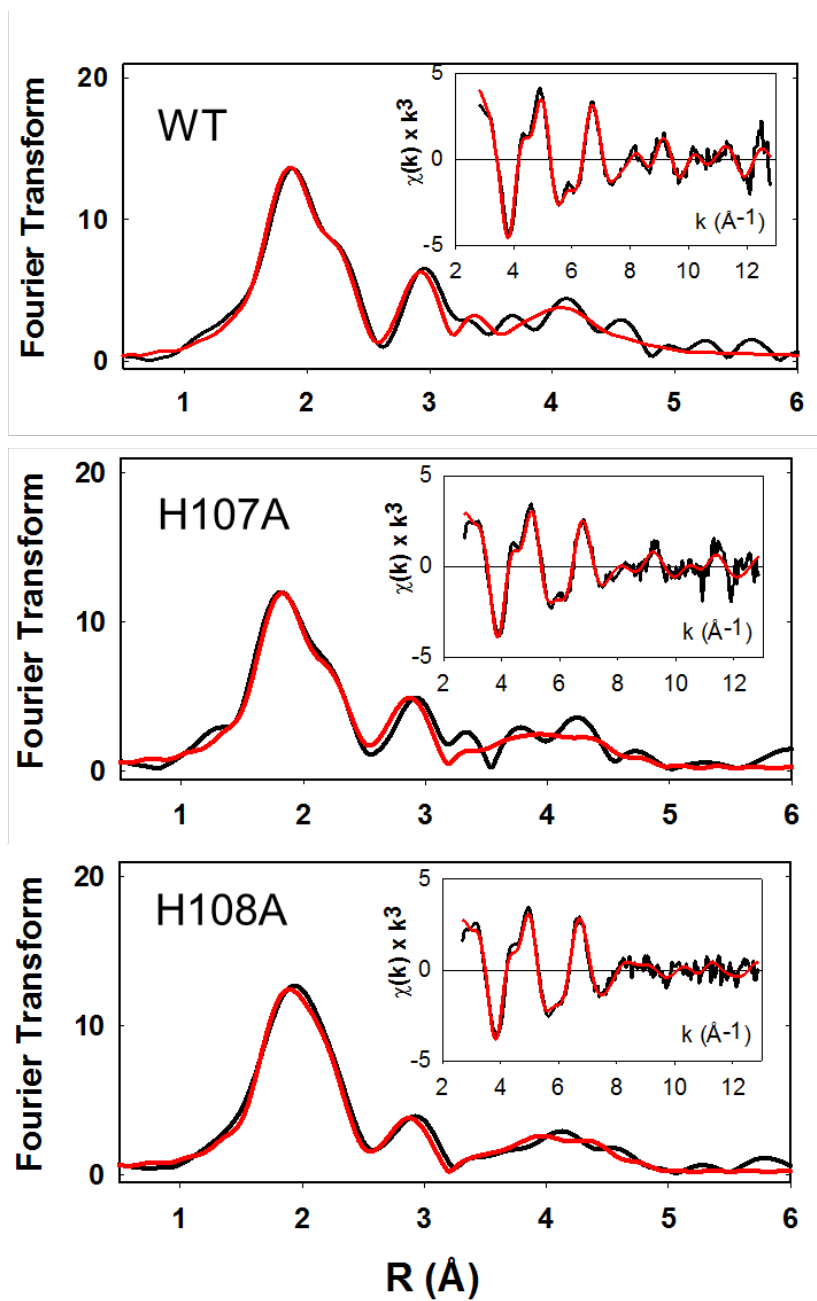

Figure S2. Experimental (black) and simulated (red) EXAFS and Fourier transforms for reduced forms of PHM H-site variants at pH 3.5.

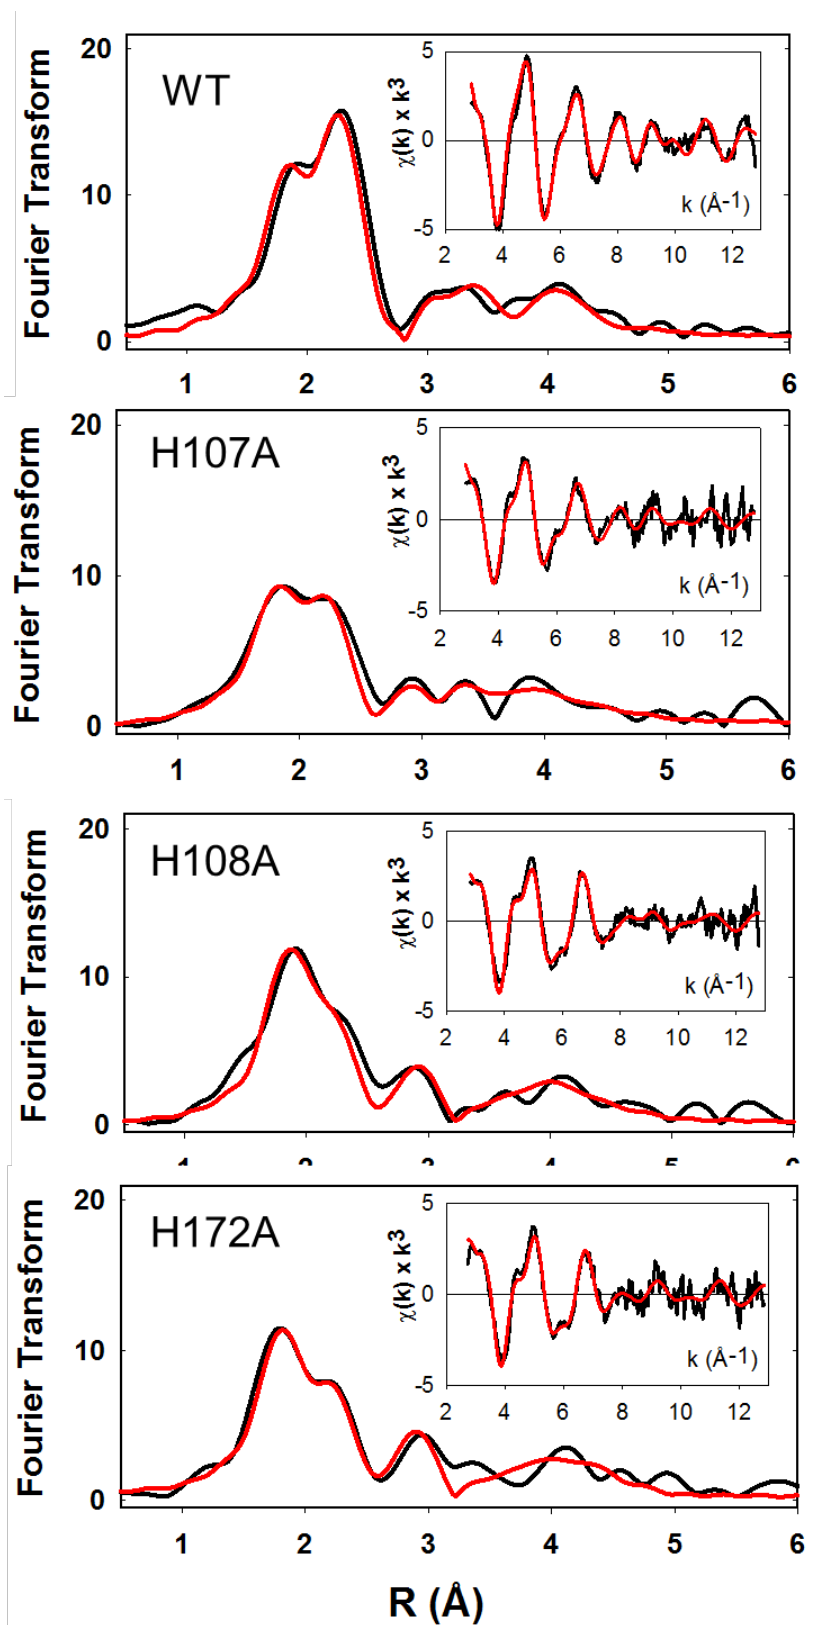

Supplement: NIHMS465223-supplement-1_si_001.pdf [file NIHMS465223-supplement-1_si_001.pdf]
